# Supplementary material for: Compatible solutes determine the heat resistance of conidia
Source: Springer Nature journal article supplement (doi:10.1186/s40694-023-00168-9), 2023-11-13

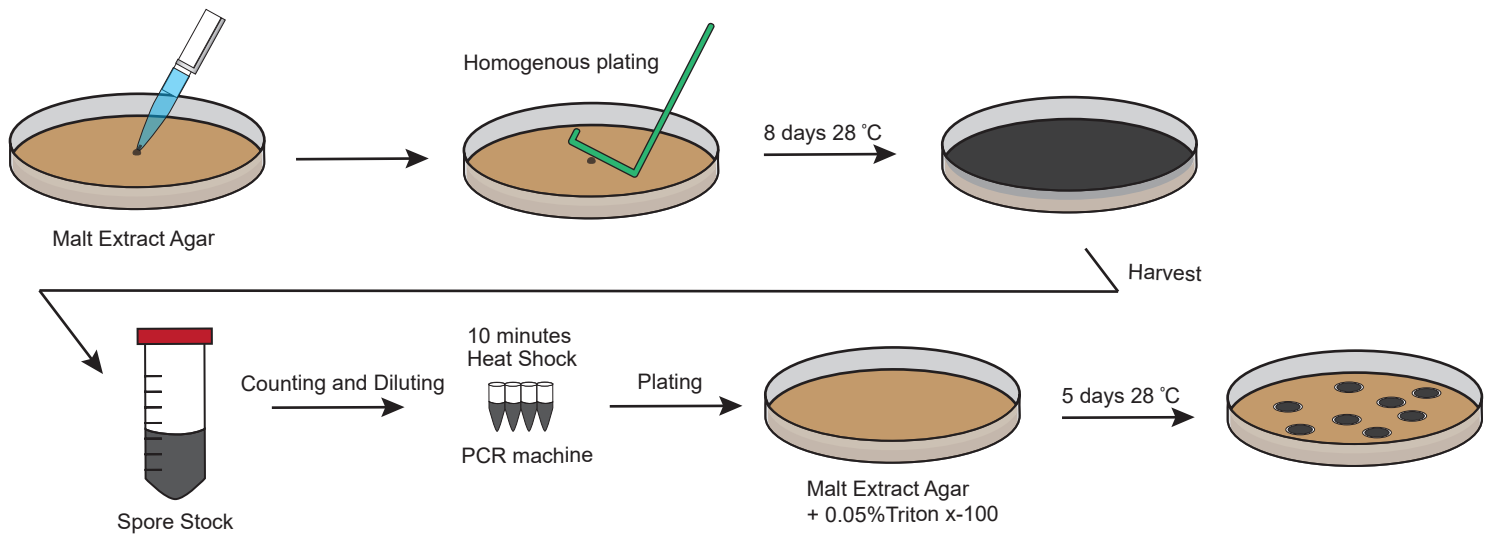

Supplement: MOESM8 [file 40694_2023_168_MOESM8_ESM.pdf]
