# Supplementary material for: Compatible solutes determine the heat resistance of conidia
Source: Springer Nature journal article supplement (doi:10.1186/s40694-023-00168-9), 2023-11-13
Supplement: MOESM12 [file 40694_2023_168_MOESM12_ESM.pdf]

**Table S3. List of strains used in this study**

| Name     | Genotype                                              | Parental strain | Reference  | Extra info strain                                                                                                        |
|----------|-------------------------------------------------------|-----------------|------------|--------------------------------------------------------------------------------------------------------------------------|
| N402     | <i>cspA1, amdS-</i>                                   | -               | (67)       | Wild type                                                                                                                |
| MA234.1  | <i>cspA1, ΔkusA::DR-amdS-DR</i>                       | N402            | (55)       |                                                                                                                          |
| SJS143   | <i>ΔNRRL3_01479; 'ΔdprA'</i>                          | MA234.1         | This study | Strain lacking a gene coding for a putative dehydrin-like protein (45)                                                   |
| SJS144   | <i>ΔNRRL3_01479; 'ΔdprB'</i>                          | MA234.1         | This study | Strain lacking a gene coding for a putative dehydrin-like protein (45)                                                   |
| SJS145   | <i>ΔNRRL3_01479, ΔNRRL3_01479; 'ΔdprAB'</i>           | MA234.1         | This study | Strain lacking both putative dehydrin-like proteins (45)                                                                 |
| SJS146   | <i>ΔNRRL3_05684; 'ΔLEA3-like'</i>                     | MA234.1         | This study | Strain lacking a LEA3-like protein thought to be involved in the cell stress response (26, 68)                           |
| SJS147.2 | <i>ΔNRRL3_02511, 'ΔconJ'</i>                          | MA234.1         | This study | Strain lacking a homologue of <i>conJ</i> as described in <i>A. nidulans</i> involved in stress response (46)            |
| JZ2.1    | <i>ΔNRRL3_11620; 'Δhsp9/12'</i>                       | MA234.1         | This study | Strain lacking putative <i>hsp12</i> homologue, important for plasma membrane stability in <i>S. cerevisiae</i> (47, 48) |
| JZ3.1    | <i>ΔNRRL3_02725; 'Δhsp104'</i>                        | MA234.1         | This study | Strain lacking putative <i>hsp104</i> homologue, important for heat resistance in <i>S. cerevisiae</i> (49, 50, 69)      |
| SJS123   | <i>cspA1, ΔkusA::DR-amdS-DR, ΔtpsAB</i>               | SJS121          | This study |                                                                                                                          |
| SJS124   | <i>cspA1, ΔkusA::DR-amdS-DR, ΔtpsAC</i>               | MA234.1         | This study |                                                                                                                          |
| SJS125   | <i>cspA1, ΔkusA::DR-amdS-DR, ΔtpsBC</i>               | SJS121          | This study |                                                                                                                          |
| SJS126   | <i>cspA1, ΔkusA::DR-amdS-DR, ΔtpsABC</i>              | SJS121          | This study |                                                                                                                          |
| SJS127   | <i>cspA1, ΔkusA::DR-amdS-DR, ΔmpdA, ΔtpsAB</i>        | SJS123          | This study |                                                                                                                          |
| SJS128   | <i>cspA1, ΔkusA::DR-amdS-DR, ΔmpdA, ΔtpsABC</i>       | SJS126          | This study |                                                                                                                          |
| SJS129   | <i>cspA1, ΔkusA::DR-amdS-DR, ΔmtdB</i>                | MA234.1         | This study |                                                                                                                          |
| SJS130   | <i>cspA1, ΔkusA::DR-amdS-DR, ΔmtdB, ΔmpdA</i>         | VO2             | This study |                                                                                                                          |
| SJS131   | <i>cspA1, ΔkusA::DR-amdS-DR, ΔmtdB, ΔtpsAB</i>        | SJS123          | This study |                                                                                                                          |
| SJS132   | <i>cspA1, ΔkusA::DR-amdS-DR, ΔmtdB, ΔtpsABC</i>       | SJS126          | This study |                                                                                                                          |
| SJS133   | <i>cspA1, ΔkusA::DR-amdS-DR, ΔmtdB, ΔmpdA, ΔtpsAB</i> | SJS127          | This study |                                                                                                                          |

|           |                                                                                               |        |                   |
|-----------|-----------------------------------------------------------------------------------------------|--------|-------------------|
| SJS134    | <i>cspA1</i> , $\Delta kusA::DR-amdS-DR$ , $\Delta mtdB$ , $\Delta mpdA$ , $\Delta tpsABC$    | SJS128 | This study        |
| SJS135    | <i>cspA1</i> , $\Delta kusA::DR-amdS-DR$ , $\Delta tpsAB$ , $\Delta mtdA$                     | SJS123 | This study        |
| SJS136    | <i>cspA1</i> , $\Delta kusA::DR-amdS-DR$ , $\Delta tpsABC$ , $\Delta mtdA$                    | SJS126 | This study        |
| SJS137    | <i>cspA1</i> , $\Delta kusA::DR-amdS-DR$ , $\Delta tpsABC$ , $\Delta mpdA$ , $\Delta mtdA$    | SJS128 | This study        |
| SJS138    | <i>cspA1</i> , $\Delta kusA::DR-amdS-DR$ , $\Delta mtdAB$                                     | SJS129 | This study        |
| SJS139    | <i>cspA1</i> , $\Delta kusA::DR-amdS-DR$ , $\Delta mtdAB$ , $\Delta mpdA$                     | SJS130 | This study        |
| SJS141    | <i>cspA1</i> , $\Delta kusA::DR-amdS-DR$ , $\Delta mtdAB$ , $\Delta tpsABC$                   | SJS132 | This study        |
| SJS142    | <i>cspA1</i> , $\Delta kusA::DR-amdS-DR$ , $\Delta mtdAB$ , $\Delta mpdA$ , $\Delta tpsABC$   | SJS134 | This study        |
| SJS149.2  | <i>cspA1</i> , $\Delta kusA::DR-amdS-DR$ , <i>mpdA</i> T669A, T672G                           | VO2    | This study        |
| SJS152.3  | <i>cspA1</i> , $\Delta kusA::DR-amdS-DR$ , <i>tpsC</i> T93A, A96T                             | SJS126 | This study        |
| SJS153    | <i>cspA1</i> , $\Delta kusA::DR-amdS-DR$ , <i>tpsA</i> T258C, G273A                           | SJS128 | This study        |
| SJS154    | <i>cspA1</i> , $\Delta kusA::DR-amdS-DR$ , <i>tpsB</i> G267A, G270A                           | SJS132 | This study        |
| SJS155    | <i>cspA1</i> , $\Delta kusA::DR-amdS-DR$ , <i>tpsA</i> T258C, G273A, <i>tpsB</i> G267A, G270A | SJS134 | This study        |
| SJS156    | <i>cspA1</i> , $\Delta kusA::DR-amdS-DR$ , $\Delta mpdA$ , $\Delta tpsABC$                    | SJS134 | This study        |
| CBS112.32 | Wild type                                                                                     | -      | (70) Wild isolate |
| CSB147347 | Wild type                                                                                     | -      | (70) Wild isolate |
