# Supplementary material for: Compatible solutes determine the heat resistance of conidia
Source: Springer Nature journal article supplement (doi:10.1186/s40694-023-00168-9), 2023-11-13
Supplement: MOESM13 [file 40694_2023_168_MOESM13_ESM.pdf]

**Table S4. Colony forming units of *A. niger* conidia from knock-out strains plated on MEA.**

| <b>Strain</b>                | <b>Average (CFUs)</b> | <b>Stdev (CFUs)</b> |
|------------------------------|-----------------------|---------------------|
| Wild type                    | 107                   | ±19                 |
| <i>ΔtpsABC</i>               | 107                   | ±19                 |
| <i>ΔmpdA, ΔtpsABC</i>        | 88                    | ±8                  |
| <i>ΔmtdB, ΔtpsABC</i>        | 92                    | ±11                 |
| <i>ΔmpdA, ΔmtdB, ΔtpsABC</i> | 73                    | ±17                 |

Conidia were counted using a Bio-Rad TC20™ automated cell counter, diluted until 100 conidia/100μl and subsequently confluent plated. This experiment was done in biological triplicates. No significantly lower amount ( $p < 0.05$  student t-test) of colonies were formed when conidia from knock-out strains were plated and compared to wild-type conidia of strain N402.
