# Supplementary material for: Compatible solutes determine the heat resistance of conidia
Source: Springer Nature journal article supplement (doi:10.1186/s40694-023-00168-9), 2023-11-13
Supplement: MOESM14 [file 40694_2023_168_MOESM14_ESM.pdf]

**Table S6. Plasmids used in this study**

| <b>Plasmid</b>         | <b>Technical name</b> | <b>Gene</b> | <b>An# (gene)</b> | <b>Gene name</b> | <b>Target sequence</b>  | <b>Reference</b> |
|------------------------|-----------------------|-------------|-------------------|------------------|-------------------------|------------------|
| pFC332                 | pFC332                | -           | -                 | -                | -                       | (70)             |
| pTLL108.1              | pTLL108.1             | -           | -                 | -                | -                       | (54)             |
| pTLL109.2              | pTLL109.2             | -           | -                 | -                | -                       | (54)             |
| pFC332_mtdA-sgRNA      | pVO1                  | NRRL3_04005 | An15g05450        | <i>mtdA</i>      | GCTGGCAAGACAGCCAGCAG    | This study       |
| pFC332_mtdB-sgRNA      | pSJS4                 | NRRL3_08606 | An03g02430        | <i>mtdB</i>      | GAATTTGTTCGCAAATCGTGG   | This study       |
| pFC332_mpdA-sgRNA      | pVO2                  | NRRL3_05796 | An02g05830        | <i>mpdA</i>      | CGATGAACTTGAGAATGTGG    | This study       |
| pFC332_tpsA-sgRNA      | pSJS2                 | NRRL3_11571 | An08g10510        | <i>tpsA</i>      | TCGCGGGTTGACGAAACAAT    | This study       |
| pFC332_tpsB-sgRNA      | pSJS3                 | NRRL3_04893 | An07g08710        | <i>tpsB</i>      | TTTGTCGTCCATGAACACCG    | This study       |
| pFC332_tpsC-sgRNA      | pSJS4                 | NRRL3_00777 | An14g02180        | <i>tpsC</i>      | TCGCTGAAAAGGTCGACGG     | This study       |
| pFC332_KORE1-sgRNA     | pTL71.1               | -           | -                 | KORE1            | CCGGCTTATATTGGTACCACTCC | This study       |
| pFC332_con10-sgRNA     |                       | NRRL3_02511 | An01g10790        | <i>conJ</i>      | AGTGTCGAATATCGCCAAGA    | This study       |
| pFC332_lea3-sgRNA      |                       | NRRL3_05684 | An02g07350        | <i>LEA3-like</i> | GCCACTGCCCGTCGTGACAA    | This study       |
| pFC332_dehydrinA-sgRNA |                       | NRRL3_01017 | An14g05070        | <i>dprA</i>      | TGGTCCCCACTCCTCCAACA    | This study       |
| pFC332_dehydrinB-sgRNA |                       | NRRL3_01479 | An13g01110        | <i>dprB</i>      | CCAGCGCAACCACTGCAACA    | This study       |
| pFC332_hsf1-sgRNA      | pHSF1_1               | NRRL3_07278 | An16g01760        | <i>hsfA</i>      | ACTGGAAGTGGAGAAAACGG    | This study       |
| pFC332_hsp12-sgRNA     | pHSP12_2              | NRRL3_11620 | An06g01610        | <i>hsp9/12</i>   | CAGCAAGTCCGGTCCCCAGG    | This study       |
| pFC332_hsp104-sgRNA    | pHSP104_2             | NRRL3_02725 | An01g13350        | <i>hsp104</i>    | GGATCGAGAAGGGCCGTCGG    | This study       |
