# Supplementary material for: Compatible solutes determine the heat resistance of conidia
Source: Springer Nature journal article supplement (doi:10.1186/s40694-023-00168-9), 2023-11-13
Supplement: MOESM15 [file 40694_2023_168_MOESM15_ESM.pdf]

**Table S5. List of primers used in this study.**

| <b>Primer</b>   | <b>Sequence</b>                               |                                     |
|-----------------|-----------------------------------------------|-------------------------------------|
| pTE1_for        | CCTTAATTAAACTCCGCCGAACGTA CTG                 | Creation sgRNA on plasmids          |
| pTE1_rev        | CCTTAATTA AAAAAGCAAAAAGGAAGGTACAAAAAAGC       | Creation sgRNA on plasmids          |
| tpsA_2_fw       | CAGCTGTGCGTTCTCCCATCGTTTTAGAGCTAGAAATAGCAAG   | 3' tpsA gRNA (target)               |
| tpsA_2_rv       | GATGGGAGAAGCGACAGCTGGACGAGCTTACTCGTTTTCG      | 5' tpsA gRNA (target)               |
| TS1_tpsA_fw     | GTTGTTGCTCGTTAAGTCGGGG                        | 5' tpsA flank (repair DNA fragment) |
| TS1_tpsA_rv     | ATAAGCCAGTCTCGCCCTTTGTGATTGTTCAACGGCCGAGGATC  | 5' tpsA flank (repair DNA fragment) |
| TS2_tpsA_fw     | GATCCTCGGCCGTTGAACAATCACAAAGGGCGAGACTGGCTTAT  | 3' tpsA flank (repair DNA fragment) |
| TS2_tpsA_rv     | GCCGGA ACTACTCTTGTCCTT                        | 3' tpsA flank (repair DNA fragment) |
| DIAG_tpsA_5'_fw | TTGGTCTTGTAGGGGTAGCTGC                        | Diagnostic PCR tpsA deletion        |
| DIAG_tpsA_3'_rv | GGTGGTTTTACTGCTGGGGTG                         | Diagnostic PCR tpsA deletion        |
| tpsB_fw         | TTTGTGTC CATGAACACCGGTTTTAGAGCTAGAAATAGCAAG   | 3' tpsB gRNA (target)               |
| tpsB_rv         | CGGTGTT CATGGACGACAAAGACGAGCTTACTCGTTTTCG     | 5' tpsB gRNA (target)               |
| TS1_tpsB_fw     | CCATCTGTCTGCCTGTCTTCA                         | 5' tpsB flank (repair DNA fragment) |
| TS1_tpsB_rv     | CTCCTTTCGCTCTGCTCTCCATTCTTTGGCGAACACAAGCAC    | 5' tpsB flank (repair DNA fragment) |
| TS2_tpsB_fw     | GTGCTTGTGTTCCCAAAGAGAATGGAGAGCAGAGCGAAAGGAG   | 3' tpsB flank (repair DNA fragment) |
| TS2_tpsB_rv     | TAGACACCCGAACCAGCAGATG                        | 3' tpsB flank (repair DNA fragment) |
| DIAG_tpsB_5'_fw | CAACCGCAACCGCTACTACTTC                        | Diagnostic PCR tpsB deletion        |
| DIAG_tpsB_3'_rv | CCGGACCAAGGGATGCTAAAGA                        | Diagnostic PCR tpsB deletion        |
| tpsC_2_fw       | TCGCTGAAAAGGTGACGGGTTTTAGAGCTAGAAATAGCAAG     | 3' tpsC gRNA (target)               |
| tpsC_2_rv       | CCGTCGACCTTTTTAGCGAGACGAGCTTACTCGTTTTCG       | 5' tpsC gRNA (target)               |
| TS1_tpsC_fw     | TGCTCGAGTCTGAGTCTGAAGC                        | 5' tpsC flank (repair DNA fragment) |
| TS1_tpsC_rv     | GCAGCTCGAAGCATTGCAATTGAGAGACCGTTGGAAGGCTGAAC  | 5' tpsC flank (repair DNA fragment) |
| TS2_tpsC_fw     | GTT CAGCCTTCCAACGGTCTCTCAATTGCAATGCTTCGAGCTGC | 3' tpsC flank (repair DNA fragment) |
| TS2_tpsC_rv     | AGCTGGAAGGCGATTGTAGGTT                        | 3' tpsC flank (repair DNA fragment) |

|                  |                                                  |                                           |
|------------------|--------------------------------------------------|-------------------------------------------|
| DIAG_tpsC_5'_fw  | AATGAATGTGTGTGGGTGCTGC                           | Diagnostic PCR<br>tpsC deletion           |
| DIAG_tpsC_3'_rv  | AAACTGGGAGCGATGCATGAAC                           | Diagnostic PCR<br>tpsC deletion           |
| mtdA_fw          | GCTGGCAAGACAGCCAGCAGGTTTTAGAGCTAGAAAATAGCAAG     | 3' mtdA gRNA<br>(target)                  |
| mtdA_rv          | CTGCTGGCTGTCTTGCCAGCGACGAGCTTACTCGTTTCG          | 5' mtdA gRNA<br>(target)                  |
| GOI5_mtdA_fw     | CGGTTTGTTCGGTCTTACGGG                            | 5' mtdA flank<br>(repair DNA<br>fragment) |
| XXGOI5_mtdA_rv   | GGAGTGGTACCAATATAAGCCGGCGCGGTCCGATAGAAAATAATGT   | 5' mtdA flank<br>(repair DNA<br>fragment) |
| XXGOI3_mtdA_fw   | CCGGCTTATATTGGTACCACTCCTGATTGAGGTAGAGATGAGTTTGGT | 3' mtdA flank<br>(repair DNA<br>fragment) |
| GOI3_mtdA_rv     | CTGCAACGTCACTTAGTGGCTG                           | 3' mtdA flank<br>(repair DNA<br>fragment) |
| DIAG_mtdA_3'_rv  | GCATGCTTGACGTACGGATTGT                           | Diagnostic PCR<br>mtdA deletion           |
| DIAG_mtdA_5'_fw  | CCCCTTGATTTCTCTCCAGCCA                           | Diagnostic PCR<br>mtdA deletion           |
| mtdB1_fw         | GAATTTGTCGCAAATCGTGGGTTTTAGAGCTAGAAAATAGCAAG     | 3' mtdB gRNA<br>(target)                  |
| mtdB1_rv         | CCACGATTTGCGACAAATTCGACGAGCTTACTCGTTTCG          | 5' mtdB gRNA<br>(target)                  |
| 5_mtdB_fw        | ATCAAGGGATGGAAGGGGTTGG                           | 5' mtdB flank<br>(repair DNA<br>fragment) |
| 5_mtdB_rv        | GGAGTGGTACCAATATAAGCCGGGCGGTGTAATTTACCTCTTTGTCGG | 5' mtdB flank<br>(repair DNA<br>fragment) |
| 3_mtdB_fw        | CCGGCTTATATTGGTACCACTCCTGGGAGGATGAAGGAGGAAGGA    | 3' mtdB flank<br>(repair DNA<br>fragment) |
| 3_mtdB_rv        | AGGTGGCACATGTTCCGGTATCA                          | 3' mtdB flank<br>(repair DNA<br>fragment) |
| DIAG_MtdB_3'_rv  | CGACCAGATCCTCGAAGGGCCA                           | Diagnostic PCR<br>mtdB deletion           |
| DIAG_MtdB_5'_fw  | CTTGCGGAATTTGCGTGGCCAC                           | Diagnostic PCR<br>mtdB deletion           |
| mpdA_fw          | CGATGAACTTGAGAATGTGGGTTTTAGAGCTAGAAAATAGC        | 3' mpdA gRNA<br>(target)                  |
| mpdA_rv          | CCACATTCTCAAGTTCATCGGACGAGCTTACTCGTTTCGT         | 5' mpdA gRNA<br>(target)                  |
| GOI5_mpdA_fw     | TAGTCGCGAGGGAGTCAAGTTG                           | 5' mpdA flank<br>(repair DNA<br>fragment) |
| NEW_GOI5_mpdA_rv | GGAGTGGTACCAATATAAGCCGGATTCCGAGTCGATCACCTGCAT    | 5' mpdA flank<br>(repair DNA<br>fragment) |
| XXGOI3_mpdA_fw   | CCGGCTTATATTGGTACCACTCCAGTGAAGTCTGATAGTAGAAGGGA  | 3' mpdA flank<br>(repair DNA<br>fragment) |
| GOI3_mpdA_rv     | TTTGATTGGCTTGGATTGGGC                            | 3' mpdA flank<br>(repair DNA<br>fragment) |
| DIAG_mpdA_3'_rv  | AATCAACCGGGACCATGACTGT                           | Diagnostic PCR<br>mpdA deletion           |
| DIAG_mpdA_5'_fw  | CCGACATGGTGATTGCGTCTTC                           | Diagnostic PCR<br>mpdA deletion           |

|                       |                                             |                                                             |
|-----------------------|---------------------------------------------|-------------------------------------------------------------|
| tpsA_KORE2_fw         | CAAGAATTACATACCTATGAAGGACAAAGGGCGAGACTGGCTT | Complementation with different KORE (no repair) for SJS156  |
| tpsA_KORE2_rv         | CCTTCATAGGTATGTAATTCTTGGATTGTTCAACGGCCGAGGA | Complementation with different KORE (no repair) for SJS156  |
| tpsB_KORE3_fw         | TTTGTTACAGTCCTCATTAAGGATGGAGAGCAGAGCGAAAGG  | Complementation with different KORE (no repair) for SJS156  |
| tpsB_KORE3_rv         | CCTTAATGAGGACTGTGAACAAATGACTGCAGCTTTTTCTTG  | Complementation with different KORE (no repair) for SJS156  |
| tpsC_KORE4_fw         | AACACCGTTTACCCCTTAAGGGCAATTGCAATGCTTCGAGCT  | Complementation with different KORE (no repair) for SJS156  |
| tpsC_KORE4_rv         | CCCTTAAGGGGGTAAACGGTGTTAGAGACCGTTGGAAGGCTGA | Complementation with different KORE (no repair) for SJS156  |
| mpdA_KORE5_fw         | TCAGTCTATCCGTTTCTTGACGGAGTGGAAGTCTGATAGTAGA | Complementation with different KORE (no repair) for SJS156  |
| mpdA_KORE5_rv         | CCGTCAAGAAACGGATAGACTGATTGCTACTGTCGCAAAGTGT | Complementation with different KORE (no repair) for SJS156  |
| SJS_compl_tpsC_seq_rv | ACGTATTGCCATTCCGTCGGAG                      | sequence silent mutations tpsC gene                         |
| compl_tpsA_fw         | CTCATCATCAATGAACACCGGCACG                   | Create complementation with 2 silent mutations in tpsA gene |
| compl_tpsA_rv         | CGTGCCGGTGTTTCATTGATGATGAG                  | Create complementation with 2 silent mutations in tpsA gene |
| seq_tpsA_fw           | GCCGATCTCCTCACGCAGCATC                      | sequence silent mutations tpsA gene                         |
| seq_tpsA_rv           | CGGTGGCCTGGTCAGTGGACTA                      | sequence silent mutations tpsA gene                         |
| compl_tpsB_fw         | CAGTTTATCATCCATGAACACCGGG                   | Create complementation with 2 silent mutations in tpsB gene |
| compl_tpsB_rv         | CCCGGTGTTTCATGGATGATAAACTG                  | Create complementation with 2 silent mutations in tpsB gene |
| seq_tpsB_fw           | AGACAAGGTCTCCTTCCCGGGC                      | sequence silent mutations tpsB gene                         |
| seq_tpsB_rv           | TCCATGTCCTCTGGTGGCCTGG                      | sequence silent mutations tpsB gene                         |

|                                  |                                                   |                                                             |
|----------------------------------|---------------------------------------------------|-------------------------------------------------------------|
| seq_mtdB_fw                      | ACCCGCATCGTGTCTCTCACCA                            | sequence silent mutations mtdB gene                         |
| seq_mtdB_rv                      | GTGACGACAGGCCAGGAGTCCT                            | sequence silent mutations mtdB gene                         |
| seq_mpdA_fw                      | CTCGTCGTCACCAGGCACGTTT                            | Create complementation with 2 silent mutations in mpdA gene |
| seq_mpdA_rv                      | CTCAGCAAGCCCCAACAGTGG                             | Create complementation with 2 silent mutations in mpdA gene |
| mpdA_comsil_fw                   | CCAAAGTAGGCCGTTGTAGCATGGCTGGTGTGACAGTGA           | sequence silent mutations mpdA gene                         |
| mpdA_comsil_rv                   | CTACAACGGCCTACTTTGGACACTTCCGGGGCAAGAAGAT          | sequence silent mutations mpdA gene                         |
| SJS_tpsC_complemenationSilent_fw | GTGACTAGTCCACCCTGGAGAGGGAAGATTCGTATCCCC           | Create complementation with 2 silent mutations in tpsC gene |
| SJS_tpsC_complemenationSilent_rv | CTCCAGTGGTGGACTAGTCACATCTTTATCGGGATTGACT          | Create complementation with 2 silent mutations in tpsC gene |
| compl3_mtdB_rv                   | GCGAGGGCAGCGTAGAGGAAACCGAAAGTGGTACGGGGGG          | Create complementation with 2 silent mutations in mpdA gene |
| compl2_mtdB_fw                   | CCCCCGTACCACTTTTCGGTTTCCTCTACGCTGCCCTCGC          | Create complementation with 2 silent mutations in mpdA gene |
| Con10_fw                         | AGTGTGCAATATCGCCAAGAGTTTTAGAGCTAGAAATAGC          | 3' <i>conJ</i> gRNA                                         |
| Con10_rv                         | TCTTGCGGATATTCGACACTGACGAGCTTACTCGTTTCGT          | 5' <i>conJ</i> gRNA                                         |
| 5_Con10_fw                       | CCCTGCCATGTAAGTTCCCGCG                            | 5' <i>conJ</i> flank (repair DNA fragment)                  |
| 5_Con10_KORE_rv                  | GGAGTGGTACCAATATAAGCCGGTGATTCTGATCCAATTCCAAACCTCA | 5' <i>conJ</i> flank (repair DNA fragment)                  |
| 3_Con10_KORE_fw                  | CCGGCTTATATTGGTACCACTCCTTGAGTGAAGGTACCGCTGGGA     | 3' <i>conJ</i> flank (repair DNA fragment)                  |
| 3_Con10_rv                       | CGTCGAGTTGAAGCGACCGGAA                            | 3' <i>conJ</i> flank (repair DNA fragment)                  |
| DIAG_Con10_5_fw                  | TAGCCTAGGCTCCCCTTCCCCA                            | Diagnostic PCR <i>conJ</i> deletion                         |
| DIAG_Con10_3_rv                  | ACGCTGCCGCTTACTGTAGCAC                            | Diagnostic PCR <i>conJ</i> deletion                         |
| Lea3_fw                          | GCCACTGCCCGTCGTGACAAGTTTTAGAGCTAGAAATAGC          | 3' <i>LEA3-like</i> gRNA                                    |
| Lea3_rv                          | TTGTACGACGGGCAGTGGCGACGAGCTTACTCGTTTCGT           | 5' <i>LEA3-like</i> gRNA                                    |

|                     |                                                  |                                                       |
|---------------------|--------------------------------------------------|-------------------------------------------------------|
| 5_Lea3_fw           | GGCAGTTGGACTGGGTTTGGGG                           | 5' <i>LEA3-like</i> flank<br>(repair DNA<br>fragment) |
| 5_Lea3_KORE_rv      | GGAGTGGTACCAATATAAGCCGGTCAAGTTGATGGGATTGAGGATGGA | 5' <i>LEA3-like</i> flank<br>(repair DNA<br>fragment) |
| 3_Lea3_KORE_fw      | CCGGCTTATATTGGTACCACTCCGCACGCTTGACGACCTGCATGA    | 3' <i>LEA3-like</i> flank<br>(repair DNA<br>fragment) |
| 3_Lea3_rv           | CCCGGACACTGGCAATTCCGTC                           | 3' <i>LEA3-like</i> flank<br>(repair DNA<br>fragment) |
| DIAG_Lea3_5_fw      | TCACCGACCAGGGGAAGGATGC                           | Diagnostic PCR<br><i>LEA3-like</i><br>deletion        |
| DIAG_Lea3_3_rv      | TGGAGACGATGGGTCCGCATGA                           | Diagnostic PCR<br><i>LEA3-like</i><br>deletion        |
| DehydrinA_fw        | TGGTCCCCTCCTCCAACAGTTTTAGAGCTAGAAATAGC           | 3' <i>dprA</i> gRNA                                   |
| DehydrinA_rv        | TGTTGGAGGAGTGGGGACCAGACGAGCTTACTCGTTTCGT         | 5' <i>dprA</i> gRNA                                   |
| 5_DehydrinA_fw      | ACCCAGACTTGGACTCGAGGC                            | 5' <i>dprA</i> flank<br>(repair DNA<br>fragment)      |
| 5_DehydrinA_KORE_rv | GGAGTGGTACCAATATAAGCCGGTGGCAATTGTATGTGTGTTTGGT   | 5' <i>dprA</i> flank<br>(repair DNA<br>fragment)      |
| 3_DehydrinA_KORE_fw | CCGGCTTATATTGGTACCACTCCGCGGGCAAACATAAATGCTTGCCT  | 3' <i>dprA</i> flank<br>(repair DNA<br>fragment)      |
| 3_DehydrinA_rv      | ACGTTCCCGCACACATATGCAT                           | 3' <i>dprA</i> flank<br>(repair DNA<br>fragment)      |
| DIAG_DehydrinA_5_fw | GACATCGACGGCACTGGCTGAG                           | Diagnostic PCR<br><i>dprA</i> deletion                |
| DIAG_DehydrinA_3_rv | CGGAAGGGCTGTTCAACCCACC                           | Diagnostic PCR<br><i>dprA</i> deletion                |
| DehydrinB_fw        | CCAGCGCAACCACTGCAACAGTTTTAGAGCTAGAAATAGC         | 3' <i>dprB</i> gRNA                                   |
| DehydrinB_rv        | TGTTGCAGTGGTTGCGCTGGGACGAGCTTACTCGTTTCGT         | 5' <i>dprB</i> gRNA                                   |
| 5_DehydrinB_fw      | CCGCAATCCACACTAGGCCGTC                           | 5' <i>dprB</i> flank<br>(repair DNA<br>fragment)      |
| 5_DehydrinB_KORE_rv | GGAGTGGTACCAATATAAGCCGGAGGTAGTATCCATTCCCCACCGT   | 5' <i>dprB</i> flank<br>(repair DNA<br>fragment)      |
| 3_DehydrinB_KORE_fw | CCGGCTTATATTGGTACCACTCCCGCTATGGGAATGAACCCCGCC    | 3' <i>dprB</i> flank<br>(repair DNA<br>fragment)      |
| 3_DehydrinB_rv      | GAAGATGGAGCACCTCAGGCCG                           | 3' <i>dprB</i> flank<br>(repair DNA<br>fragment)      |
| DIAG_DehydrinB_5_fw | GGCGATCGTGGTGCTCTTGAGG                           | Diagnostic PCR<br><i>dprB</i> deletion                |
| DIAG_DehydrinB_3_rv | AGAGGATTGGGTGCGCTGGAGT                           | Diagnostic PCR<br><i>dprB</i> deletion                |
| HSF1_fw_1           | ACTGGAAGTGGAGAAAACGGGTTTTAGAGCTAGAAATAGCAAG      | PCR target<br>3'flank                                 |
| HSF1_rv_1           | CCGTTTTCTCCAGTCCAGTGACGAGCTTACTCGTTTCG           | PCR target 5'<br>flank                                |
| HSP12_fw_2          | CAGCAAGTCCGGTCCCCAGGGTTTTAGAGCTAGAAATAGCAAG      | PCR target<br>3'flank                                 |
| HSP12_rv_2          | CCTGGGGACCCGGACTTGCTGGACGAGCTTACTCGTTTCG         | PCR target 5'<br>flank                                |
| HSP104_fw_2         | GGATCGAGAAGGGCCGTCGGGTTTTAGAGCTAGAAATAGCAAG      | PCR target<br>3'flank                                 |

|                   |                                               |                                                  |
|-------------------|-----------------------------------------------|--------------------------------------------------|
| HSP104_rv_2       | CCGACGGCCCTTCTCGATCCGACGAGCTTACTCGTTTCG       | PCR target 5' flank                              |
| NRRL3-02725-5'-fw | ACGTGCTGGTCAAGTGTATCGA                        | Donor DNA<br>Hsp104 deletion;<br>Diagnostic PCR  |
| NRRL3-02725-5'-rv | GGAGTGGTACCAATATAAGCCGGGGTGGTTGATGGGTAGATGGAA | Donor DNA<br>Hsp104 deletion                     |
| NRRL3-02725-3'-fw | CCGGCTTATATTGGTACCACTCCGGCGGAATGTGAGGGAAGAATG | Donor DNA<br>Hsp104 deletion                     |
| NRRL3-02725-3'-rv | GCTTGAGCATCCCAAGGAGAGA                        | Donor DNA<br>Hsp104 deletion;<br>Diagnostic PCR  |
| NRRL3-07278-5'-fw | GAAATCAGGCTTTGGGACAGGC                        | Donor DNA Hsf1<br>deletion                       |
| NRRL3-07278-5'-rv | GGAGTGGTACCAATATAAGCCGGCGGTCGGTAAAGAGCAAAGACG | Donor DNA Hsf1<br>deletion                       |
| NRRL3-07278-3'-fw | CCGGCTTATATTGGTACCACTCCTGTGTCCGCGGAAGGCAATATA | Donor DNA Hsf1<br>deletion                       |
| NRRL3-07278-3'-rv | TAGGCGATGACACAGACCAAGG                        | Donor DNA Hsf1<br>deletion                       |
| NRRL3-11620-5'-fw | ATGATACTGCGGATGAGGAGGC                        | Donor DNA<br>Hsp9/12 deletion;<br>Diagnostic PCR |
| NRRL3-11620-5'-rv | GGAGTGGTACCAATATAAGCCGGCGCCACACCCTGATTACAATCG | Donor DNA<br>Hsp9/12 deletion                    |
| NRRL3-11620-3'-fw | CCGGCTTATATTGGTACCACTCCAAGTTGCTCCATGACGTCGAC  | Donor DNA<br>Hsp9/12 deletion                    |
| NRRL3-11620-3'-rv | TTTGTCTCCCAAGTAGGCCGAG                        | Donor DNA<br>Hsp9/12 deletion;<br>Diagnostic PCR |
